# Supplementary material
Source: bioRxiv or medRxiv preprint supplement (https://medrxiv.org/highwire/filestream/93827/field_highwire_adjunct_files/0/2020.08.18.20177410-1.pdf)
Supplement: Supplementary file [file 2020.08.18.20177410-1.pdf]

## Appendices 1a-1d

### Appendix 1a: Perceived stress items

1. In the past month, how often have you been upset because of something that happened unexpectedly?

0, Never

1, Almost Never

2, Sometimes

3, Fairly Often

4, Very Often

2. In the past month, how often have you felt unable to control the important things in your life?

0, Never

1, Almost Never

2, Sometimes

3, Fairly Often

4, Very Often

3. In the past month, how often have you felt nervous or stressed?

0, Never

1, Almost Never

2, Sometimes

3, Fairly Often

4, Very Often

4. In the past month, how often have you felt confident about your ability to handle personal problems?

0, Never

1, Almost Never

2, Sometimes

3, Fairly Often

4, Very Often

5. In the past month, how often have you felt that things were going your way?

0, Never

1, Almost Never

2, Sometimes

3, Fairly Often

4, Very Often

6. In the past month, how often have you found that you could not cope with all the things you had to do?

0, Never

1, Almost Never

2, Sometimes

3, Fairly Often

4, Very Often

7. In the past month, how often have you been able to control irritations in your life?

0, Never

1, Almost Never

**Appendix 1a: Perceived stress items**

- 2, Sometimes
- 3, Fairly Often
- 4, Very Often

8. In the past month, how often have you felt that you were on top of things?

- 0, Never
- 1, Almost Never
- 2, Sometimes
- 3, Fairly Often
- 4, Very Often

9. In the past month, how often have you been angry because of things that happened that were outside of your control?

- 0, Never
- 1, Almost Never
- 2, Sometimes
- 3, Fairly Often
- 4, Very Often

10. In the past month, how often have you felt that difficulties were piling up so high that you could not overcome them?

- 0, Never
- 1, Almost Never
- 2, Sometimes
- 3, Fairly Often
- 4, Very Often

**Appendix 1b: Burnout items**

Domain

*Physical Fatigue*

Item

1. I feel tired

1, Never or almost never

2, Very infrequently

3, Quite infrequently

4, Sometimes

5, Quite frequently

6, Very frequently

7, Always or almost always

2. I have no energy for going to work in the morning

1 Never or almost never

2 Very infrequently

3 Quite infrequently

4 Sometimes

5 Quite frequently

6 Very frequently

7 Always or almost always

3. I feel physically drained

1 Never or almost never

2 Very infrequently

3 Quite infrequently

4 Sometimes

5 Quite frequently

6 Very frequently

7 Always or almost always

4. I feel fed up

1 Never or almost never

2 Very infrequently

3 Quite infrequently

4 Sometimes

5 Quite frequently

6 Very frequently

7 Always or almost always

5. I feel like my "batteries" are "dead"

1 Never or almost never

2 Very infrequently

3 Quite infrequently

4 Sometimes

5 Quite frequently

6 Very frequently

7 Always or almost always

6. I feel burned out

**Appendix 1b: Burnout items**

- 1 Never or almost never
- 2 Very infrequently
- 3 Quite infrequently
- 4 Sometimes
- 5 Quite frequently
- 6 Very frequently
- 7 Always or almost always

***Cognitive weariness***

7. My thinking process is slow

- 1 Never or almost never
- 2 Very infrequently
- 3 Quite infrequently
- 4 Sometimes
- 5 Quite frequently
- 6 Very frequently
- 7 Always or almost always

8. I have difficulty concentrating

- 1 Never or almost never
- 2 Very infrequently
- 3 Quite infrequently
- 4 Sometimes
- 5 Quite frequently
- 6 Very frequently
- 7 Always or almost always

9. I feel I'm not thinking clearly

- 1 Never or almost never
- 2 Very infrequently
- 3 Quite infrequently
- 4 Sometimes
- 5 Quite frequently
- 6 Very frequently
- 7 Always or almost always

10. I feel I'm not focused in my thinking

- 1 Never or almost never
- 2 Very infrequently
- 3 Quite infrequently
- 4 Sometimes
- 5 Quite frequently
- 6 Very frequently
- 7 Always or almost always

11. I have difficulty thinking about complex things

- 1 Never or almost never
- 2 Very infrequently

**Appendix 1b: Burnout items**

- 3 Quite infrequently
- 4 Sometimes
- 5 Quite frequently
- 6 Very frequently
- 7 Always or almost always

***Emotional exhaustion***

12. I feel I am unable to be sensitive to the needs of coworkers and patients

- 1 Never or almost never
- 2 Very infrequently
- 3 Quite infrequently
- 4 Sometimes
- 5 Quite frequently
- 6 Very frequently
- 7 Always or almost always

13. I feel I am not capable of investing emotionally in coworkers and patients

- 1 Never or almost never
- 2 Very infrequently
- 3 Quite infrequently
- 4 Sometimes
- 5 Quite frequently
- 6 Very frequently
- 7 Always or almost always

14. I feel I am not capable of being sympathetic to co-workers and patients

- 1 Never or almost never
- 2 Very infrequently
- 3 Quite infrequently
- 4 Sometimes
- 5 Quite frequently
- 6 Very frequently
- 7 Always or almost always

## Appendix 1c: Perceived preparedness items

### Appendix 1: Distribution of Responses to individual preparedness questions

1. How prepared are you as a health care provider in your ability to assess and triage patients with acute respiratory symptoms?

0, Not at all prepared

1, A little prepared

2, Prepared

3, Very prepared

5, Not applicable to my role

2. How prepared are you as a health care provider in your ability to diagnose a patient with COVID-19?

0, Not at all prepared

1, A little prepared

2, Prepared

3, Very prepared

4, I don't know about this

5, Not applicable to my role

3. How prepared are you as a health care provider in your ability to manage a patient with diagnosed COVID-19?

0, Not at all prepared

1, A little prepared

2, Prepared

3, Very prepared

4, I don't know about this

5, Not applicable to my role

4. How prepared are you as a health care provider in your ability to accurately put on PPE?

0, Not at all prepared

1, A little prepared

2, Prepared

3, Very prepared

4, I don't know about this

5. How prepared are you as a health care provider in your ability to safely take take off PPE?

0, Not at all prepared

1, A little prepared

2, Prepared

3, Very prepared

4, I don't know about this

6. How prepared are you as a health care provider in your ability to implement standard contact precautions?

0, Not at all prepared

1, A little prepared

2, Prepared

3, Very prepared

4, I don't know about this

**Appendix 1c: Perceived preparedness items**

7. How prepared are you as a health care provider in your ability to implement standard airborne precautions?

- 0, Not at all prepared
- 1, A little prepared
- 2, Prepared
- 3, Very prepared
- 4, I don't know about this

8. How prepared are you as a health care provider in your ability to communicate COVID-19 risks to your patients?

- 0, Not at all prepared
- 1, A little prepared
- 2, Prepared
- 3, Very prepared

9. How prepared are you as a health care provider in your ability to educate the public about COVID-19?

- 0, Not at all prepared
- 1, A little prepared
- 2, Prepared
- 3, Very prepared

10. How prepared are you as a health care provider in your ability to ration scarce life-saving commodities?

- 0, Not at all prepared
- 1, A little prepared
- 2, Prepared
- 3, Very prepared
- 4, I don't know about this

11. As a health care provider, how mentally prepared are you to attend to a person diagnosed with COVID-19?

- 0, Not at all prepared
- 1, A little prepared
- 2, Prepared
- 3, Very prepared
- 4, I don't know about this

12. How prepared is the health facility you work in to diagnose COVID-19?

- 0, Not at all prepared
- 1, A little prepared
- 2, Prepared
- 3, Very prepared
- 4, I don't know about this

13. How prepared is the health facility you work in to manage patients diagnosed with COVID-19?

- 0, Not at all prepared
- 1, A little prepared
- 2, Prepared
- 3, Very prepared
- 4, I don't know about this

**Appendix 1c: Perceived preparedness items**

14. How prepared is the health facility you work in to prevent the spread of COVID-19 to other patients and health workers if you had an infected patient?

- 0, Not at all prepared
- 1, A little prepared
- 2, Prepared
- 3, Very prepared
- 4, I don't know about this

15. How prepared is the health facility you work in to prevent spread of COVID-19 to other patients and health workers if you had an infected health worker?

- 0, Not at all prepared
- 1, A little prepared
- 2, Prepared
- 3, Very prepared
- 4, I don't know about this



**Appendix 1d: Perceived knowledge items**

1. Which of the following are considered PPEs? Select all that apply.

- 1, Gloves
- 2, Masks
- 3, Respirators
- 4, Goggles
- 5, Gowns
- 6, Aprons
- 7, Boots
- 8, Ventilators
- 9, Medications

2. What PPE does one need to do a screening for a person suspected to have COVID-19? Select all that apply.

- 1, Gloves
- 2, Masks
- 3, Respirators
- 4, Goggles
- 5, Gowns
- 6, Aprons
- 7, Boots
- 8, Ventilators
- 9, Medications

3. What PPEs does one need to do attend to someone confirmed to have COVID-19? Select all that apply.

- 1, Gloves
- 2, Masks
- 3, Respirators
- 4, Goggles
- 5, Gowns
- 6, Aprons
- 7, Boots
- 8, Ventilators
- 9, Medications

4. How is COVID-19 currently thought to spread? Select all that apply.

- 1, Person to person through close contact
- 2, Through contact with contaminated surfaces
- 3, Through respiratory droplets
- 4, Through food and water
- 5, Through blood

5. Who is more at risk of getting severe forms of COVID-19? Select all that apply.

- 0, Young children
- 1, Young adults
- 2, The elderly
- 3, Men
- 4, Women
- 5, Everybody

### Appendix 1d: Perceived knowledge items

6, People with preexisting medical conditions

6. What are the main symptoms of COVID-19? Select all that apply.

- 1, Fever
- 2, Cough
- 3, Shortness of breath
- 4, Running nose
- 4, Diarrhoea
- 5, Headache
- 6, Body pains
- 7, Sore throat

7. Can one spread the virus even when they are not showing signs and symptoms of COVID-19?

- 0, No
- 1, Yes

8. What are some ways people protect themselves from getting COVID-19? Select all that apply.

- 1, Wash hands with soap and water
- 2, Avoid close contact with people
- 3, Cover your mouth and nose with a cloth face cover when around others
- 4, Cover coughs and sneezes
- 5, Clean and disinfect
- 6, Sanitizer with at least 60% alcohol
- 7, Sanitizer with any amount of alcohol
- 8, Bathing regularly
- 10, Not talking to people
- 11, Not shaking hands
- 12, Not eating with people

9. How is the disease managed? Select all that apply.

- 1, Fluid support
- 2, Respiratory support
- 3, Rest
- 4, Antibiotics
- 5, Antivirals
- 6, Pain medication
- 7, Antypiretics

10. Can one be cured of the disease?

- 0, No
- 1, Yes
- 2, Don't know

11. Which of the following people should be quarantined? Select all that apply.

- 0, Someone who might have been exposed to COVID-19
- 1, Someone who is showing signs of COVID-19
- 2, Someone who has recently traveled to a place with confirmed cases

**Appendix 1d: Perceived knowledge items**

12. Which of the following people should be isolated? Select all that apply.

- 0, Someone who might have been exposed to COVID-19
- 1, Someone who is showing signs of COVID-19
- 2, Someone who has recently traveled to a place with confirmed cases

13. What is contact tracing?

- 0, Identifying and isolating everyone an infected person knows who can be infected
- 1, Identifying and following up with everyone an infected person has been in contact with since disease onset
- 2, Identifying and quarantining all family members of an infected person
- 3, Identifying and isolating all family members of an infected person
- 4, Identifying and asking all family members of an infected person to practice social distancing
